# Supplementary material
Source: PubMed Central journal article supplement (PMC6082738)
Supplement: NIHMS940797-supplement-Supp_info.pdf [file NIHMS940797-supplement-Supp_info.pdf]

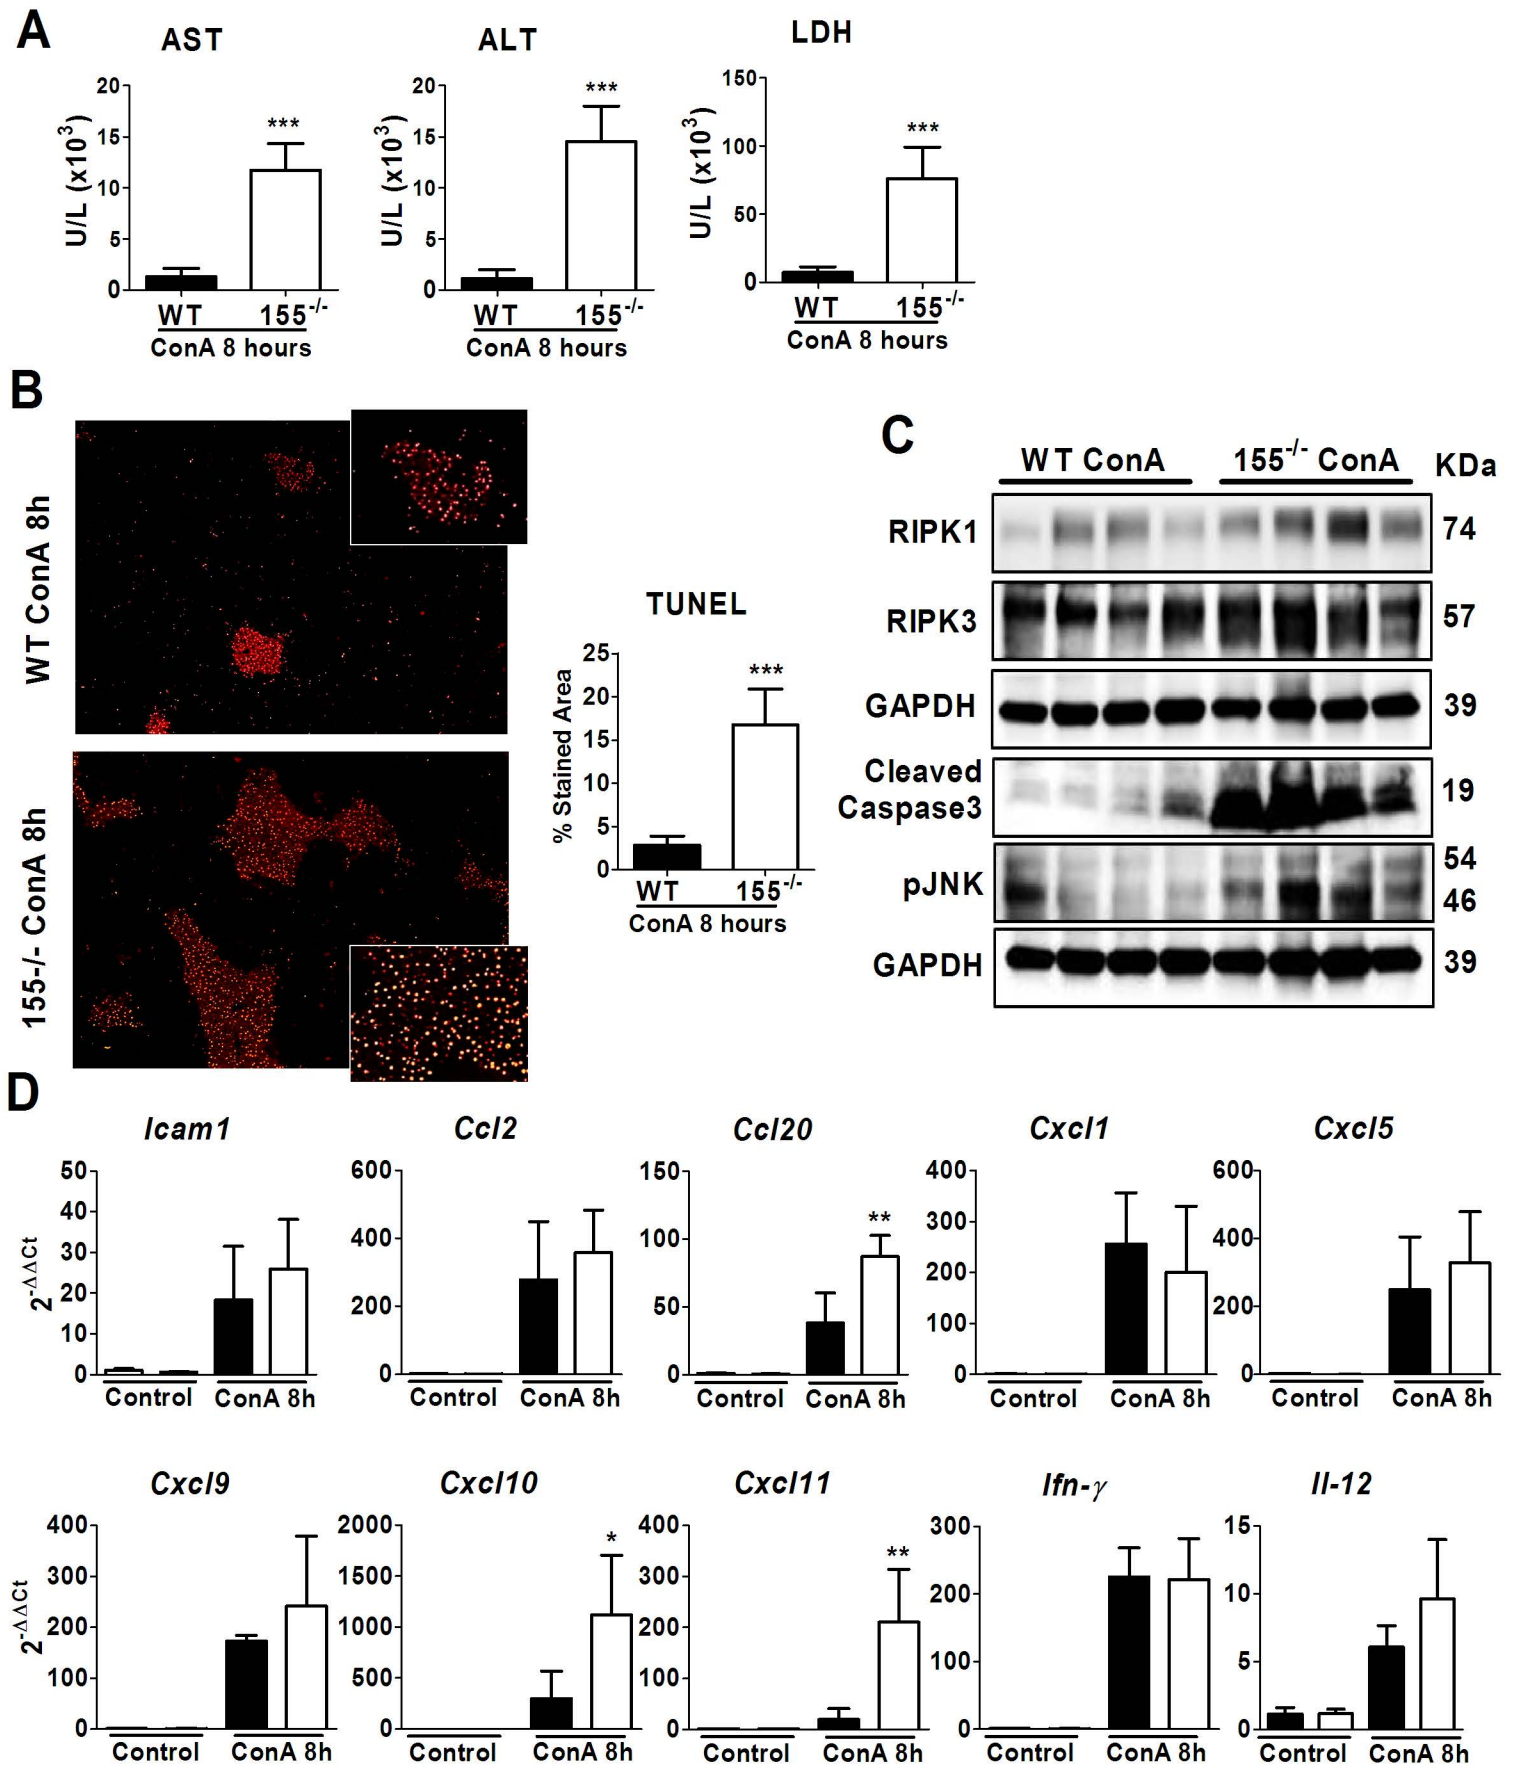

Supplementary Figure 1

**A**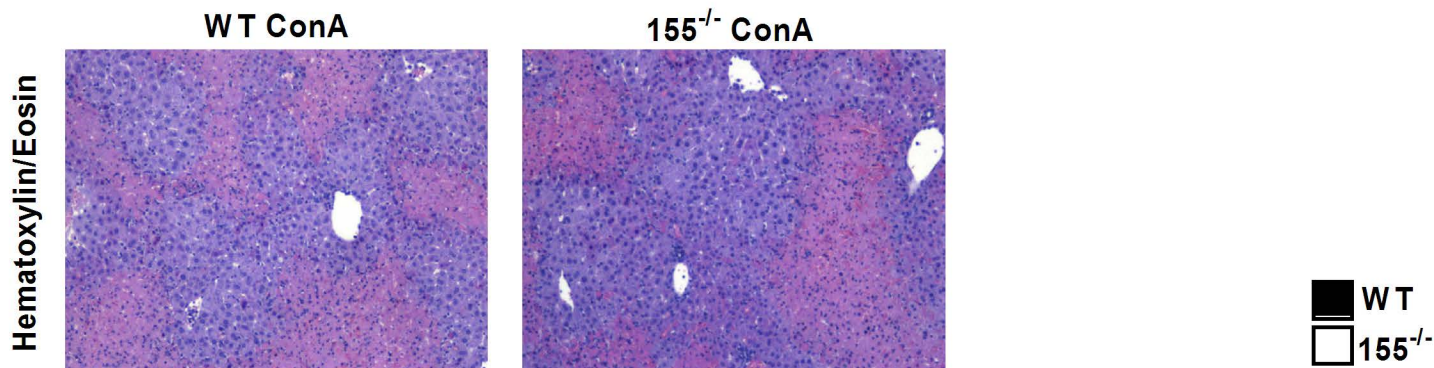**B**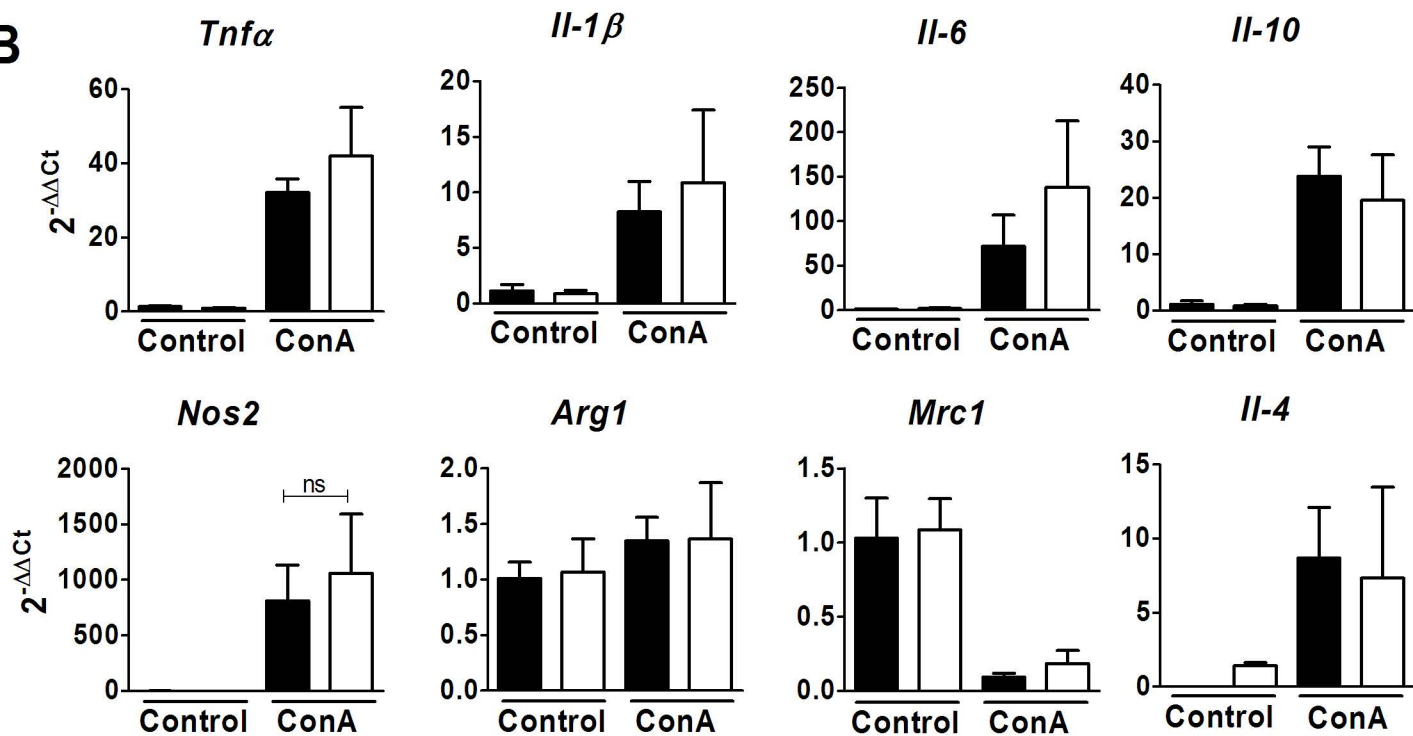

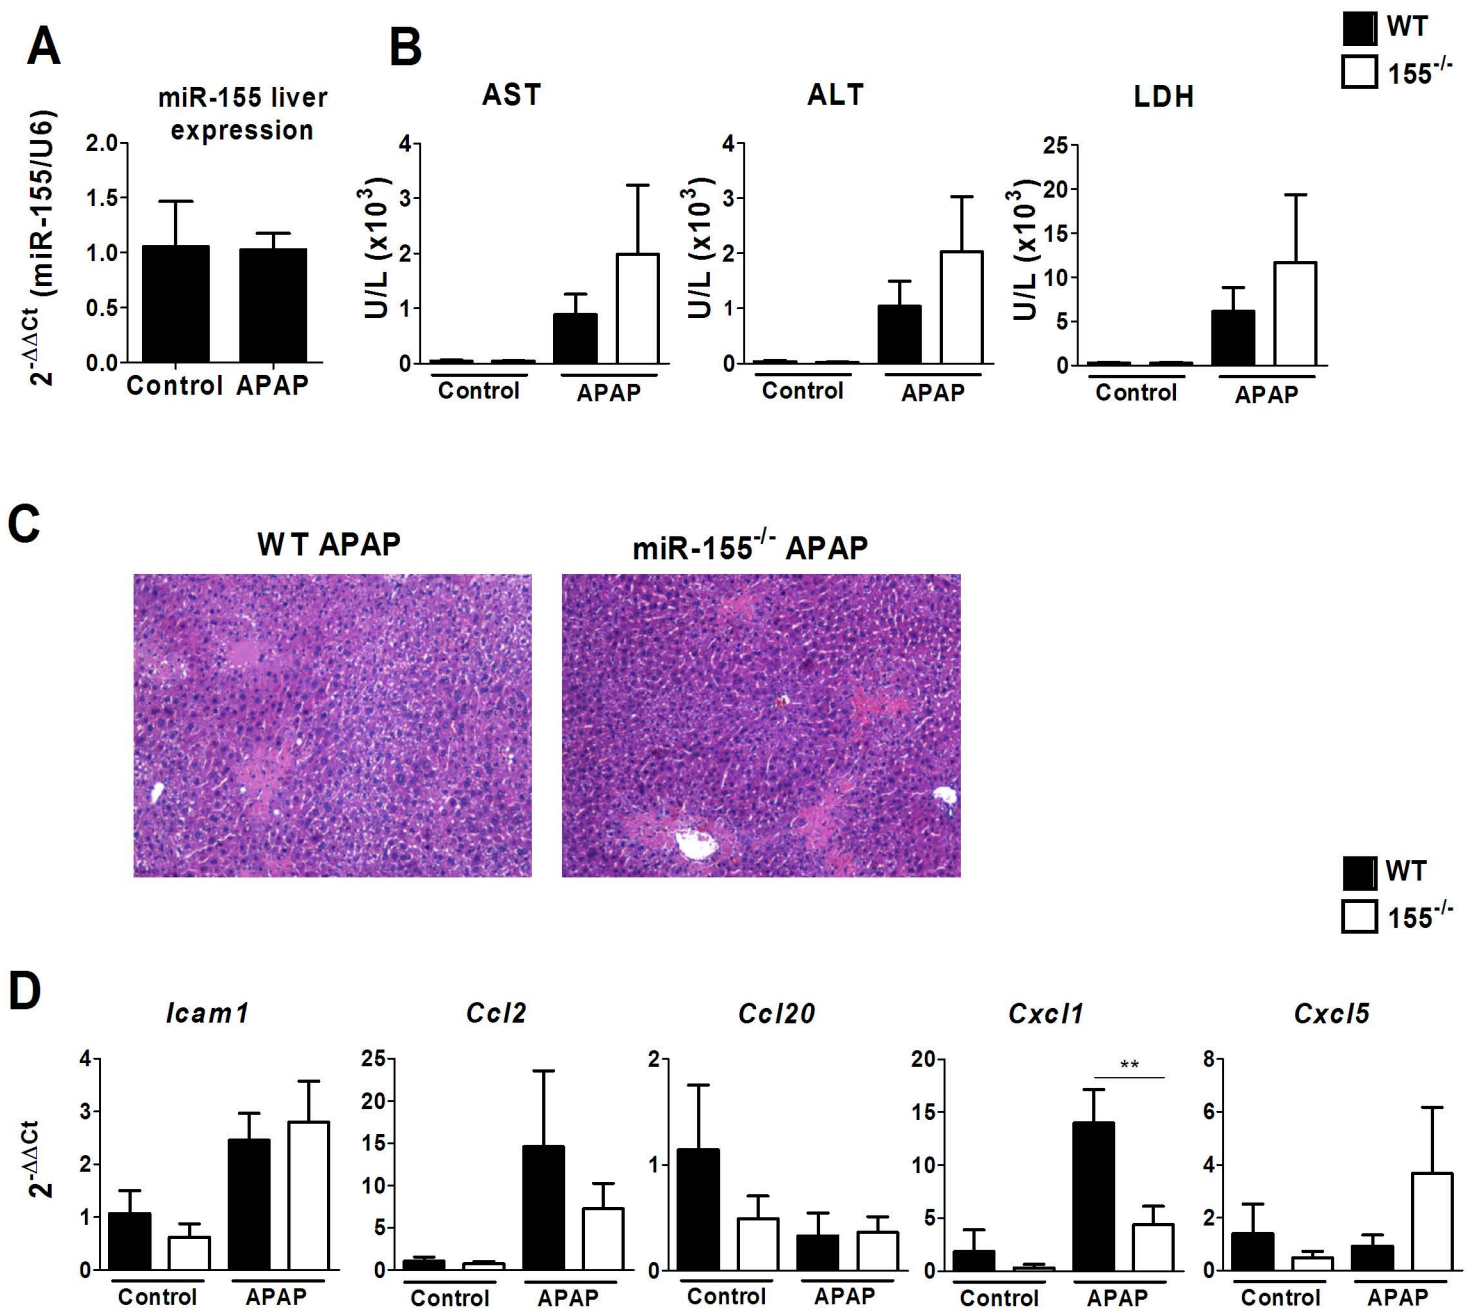

Supplementary figure 3

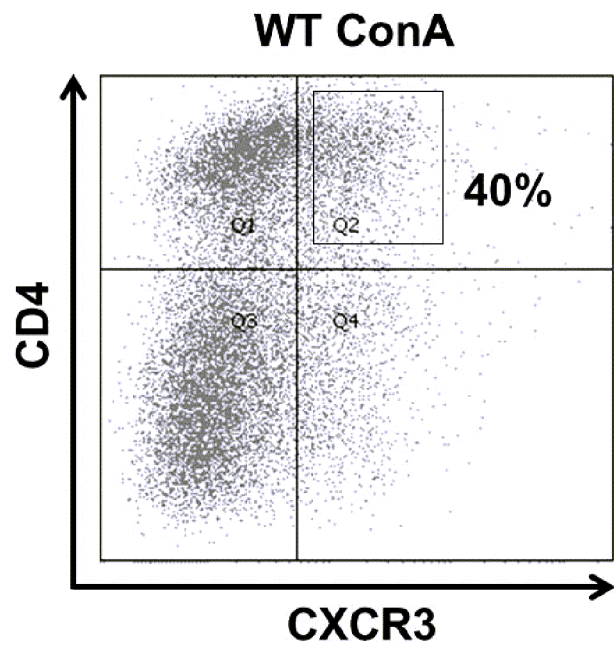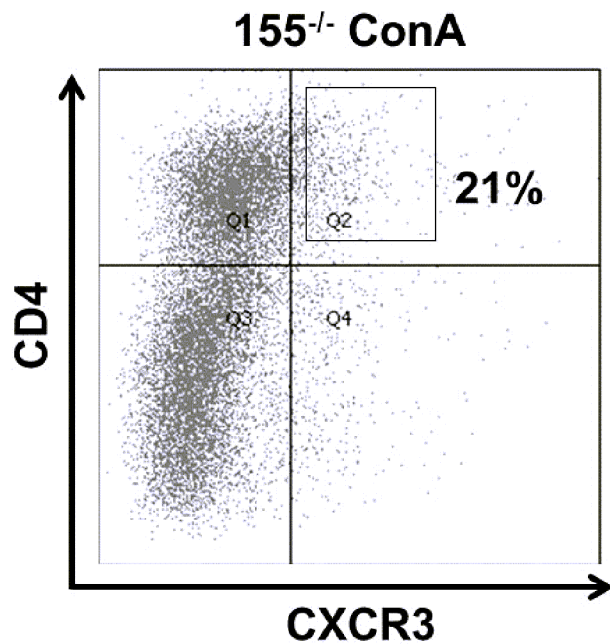

**Supplementary Figure 4**

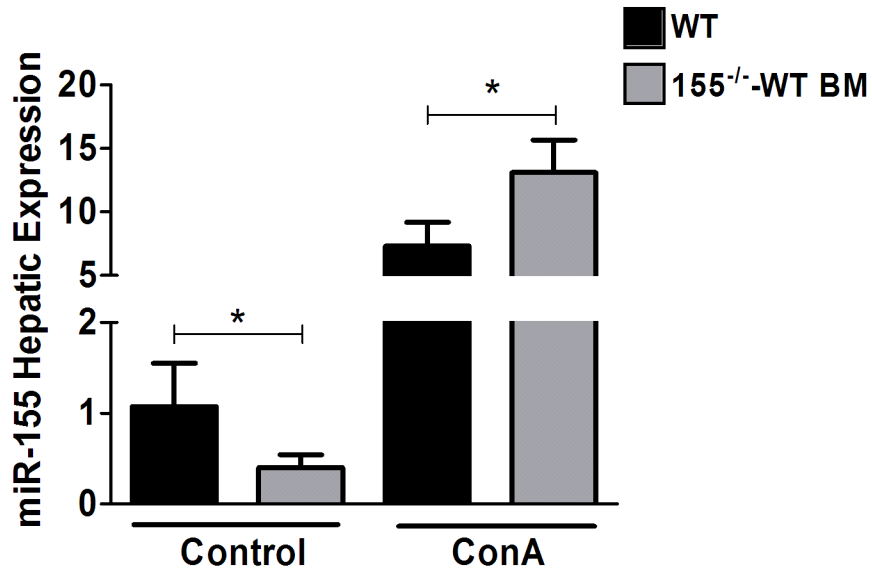

**Supplementary Figure 5**

**Supplementary figure 1.** Wild type and miR-155<sup>-/-</sup> mice were treated with 10 mg/Kg ConA during 8 hours (WT, n=5; miR-155<sup>-/-</sup> n=6). **(A)** Liver transaminases and LDH levels were measured in serum. **(B)** Representative images of livers analysed by TUNEL assay staining at 40X magnification and quantification of the stained areas; \*\*\*p<0.001 with respect to WT ConA-treated animals. **(C)** Protein levels of RIPK1, RIPK3, cleaved Caspase 3 and pJNK were determined by Western Blot in livers of WT and miR-155<sup>-/-</sup> ConA-treated animals. GAPDH was used as a loading control. **(D)** Hepatic gene expression of several cytokines was measured by qPCR and expressed as 2<sup>-ΔΔCt</sup> with respect to WT vehicle-treated mice. Significant p values are shown above the bars: \*p< 0.05, \*\*p<0.01, \*\*\*p<0.001 with respect to WT vehicle-treated animals.

**Supplementary figure 2.** Wild type and miR-155<sup>-/-</sup> mice were treated with physiological saline (WT, n=6; miR-155<sup>-/-</sup>, n=6) or with 10 mg/Kg ConA (WT, n=5; miR-155<sup>-/-</sup> n=4) during 18 hours. **(A)** Representative haematoxylin/eosin staining of livers of WT and miR-155<sup>-/-</sup> ConA-treated animals (X100 magnifications). **(B)** Hepatic gene expressions of other inflammatory cytokines in by quantitative PCR and expressed as 2<sup>-ΔΔCt</sup> with respect to WT vehicle-treated mice.

**Supplementary figure 3. Deficiency in miR-155 slightly affects liver injury in an APAP model.** Wild type and miR-155<sup>-/-</sup> animals were treated with physiological saline (WT, n=6; miR-155<sup>-/-</sup>, n=5) or with 500 mg/Kg of acetaminophen (WT, n=4; miR-155<sup>-/-</sup>, n=6) **(A)** Liver expression of miR-155 was measured in WT mice **(B)** Liver transaminases and LDH levels were measured in serum. **(C)** Representative haematoxylin/eosin staining of livers of WT or miR155<sup>-/-</sup> APAP-treated animals (X100 magnification) **(D)** Hepatic gene expression of several cytokines was measured by qPCR and expressed as 2<sup>-ΔΔCt</sup> with respect to WT vehicle-treated mice. Significant p values are shown above the bars: \*\*p< 0.01 with respect to WT vehicle-treated animals.

**Supplementary figure 4.** Representative flow cytometry plots from livers of ConA-treated mice showing CD4<sup>+</sup>CXCR3<sup>+</sup> cells in WT and 155<sup>-/-</sup> animals (40, 28 ± 7,8% and 21, 20 ± 0, 46% respectively, from total CD4<sup>+</sup> cells).

**Supplementary figure 5.** Hepatic expression of miR-155 in WT animals (n=3) and miR-155<sup>-/-</sup> WT-BM (n=5). Significant p values are shown above the bars: \* p <0.05 with respect WT vehicle- treated animals.

**Supplementary Table 1. Demographic, clinical and laboratory characteristics of the AIH patients from whom liver biopsy was obtained (n=15)**

| <b>Characteristics</b>               | <b>AIH Patients</b> |
|--------------------------------------|---------------------|
| Age (years)                          | 50±15               |
| Male, n (%)                          | 7 (47%)             |
| Presence of ascites, n (%)           | 3 (20%)             |
| AST (U/L)                            | 414 ± 573           |
| ALT (U/L)                            | 487 ± 601           |
| Serum bilirubin (mg/dL)              | 6.5 ± 7.5           |
| Serum albumin (g/L)                  | 35 ± 6              |
| INR                                  | 1.5 ± 0.3           |
| Platelet count (10 <sup>9</sup> /L)  | 145 ± 45            |
| Leukocyte count (10 <sup>9</sup> /L) | 6.2 ± 1.8           |
| C-reactive protein (mg/dL)           | 1.3 ± 1.3           |
| Fibrosis grade (% F1/F3/F4)          | 10/50/30            |
| Alkaline Phosphatase (U/L)           | 242 ± 272           |
| GGT (U/L)                            | 221 ± 208           |

Quantitative variables expressed as mean ± standard deviation. Qualitative variables expressed as absolute number and frequency (%).



**Supplementary Table 2 Demographic, clinical and laboratory characteristics of the AIH patients from whom PBMCs were obtained (n=15).**

| <b>Characteristics</b>               | <b>AIH Patients</b> |
|--------------------------------------|---------------------|
| Age (years)                          | 58±17               |
| Male, n (%)                          | 5 (37.5%)           |
| Presence of ascites, n (%)           | 2 (14.3%)           |
| AST (U/L)                            | 255±586             |
| ALT (U/L)                            | 309±772             |
| Serum bilirubin (mg/dL)              | 2.7±4.9             |
| Serum albumin (g/L)                  | 39±5                |
| INR                                  | 1.14±0.23           |
| Platelet count (10 <sup>9</sup> /L)  | 220±97              |
| Leukocyte count (10 <sup>9</sup> /L) | 6.8±2.1             |
| C-reactive protein (mg/dL)           | 0.27±0.26           |
| Alkaline Phosphatase (U/L)           | 149±116             |
| GGT (U/L)                            | 182±236             |

Quantitative variables expressed as mean ± standard deviation. Qualitative variables expressed as absolute number and frequency (%).

**Supplementary Table 3 Demographic, clinical and laboratory characteristics of patients with compensated (n=6) and decompensated cirrhosis (n=10).**

| <b>Characteristics</b>               | <b>Compensated<br/>cirrhosis</b> | <b>Decompensated<br/>cirrhosis</b> |
|--------------------------------------|----------------------------------|------------------------------------|
| Age (years)                          | 61±9                             | 51±15                              |
| Male, n (%)                          | 4(67%)                           | 9 (90%)                            |
| Presence of ascites, n (%)           | 0                                | 9 (90%)                            |
| AST (U/L)                            | 32±8                             | 218 ± 296                          |
| ALT (U/L)                            | 28±90                            | 109 ± 121                          |
| Serum bilirubin (mg/dL)              | 117±47                           | 10.4 ± 11                          |
| Serum albumin (g/L)                  | 86±58                            | 27 ± 6                             |
| INR                                  | 0,7±0,2                          | 1.9 ±0.3                           |
| Platelet count (10 <sup>9</sup> /L)  | 139±73                           | 111 ± 93                           |
| Leukocyte count (10 <sup>9</sup> /L) | 6,4±1,7                          | 8.9 ± 5.3                          |
| C-reactive protein (mg/dL)           | 0,9±1,6                          | 4.7 ±4                             |
| Child-Pugh score                     | 5±0                              | 10 ± 2                             |
| Alkaline Phosphatase (U/L)           | 117±47                           | 137 ± 85                           |
| GGT (U/L)                            | 86±58                            | 258 ± 445                          |

Quantitative variables expressed as mean ± standard deviation. Qualitative variables expressed as absolute number and frequency (%).

## SUPPLEMENTARY MATERIAL

### Isolation of mononuclear liver cells and flow cytometry analysis

Livers were collected from the mice and physically disaggregated through a 70 µm cell strainer. Next, non-parenchymal cells were separated by density gradient with Ficoll (GE Healthcare, IL, US); afterwards the mononuclear cell layer was collected. Cells were stained with fluorescent antibodies as follows: macrophages were stained with Rat Anti-Mouse F4/80-PE (e-Bioscience) and Rat Anti-Mouse CD11b-Alexa Fluor 647 (BD Bioscience) to discriminate infiltrating monocytes and resident liver macrophages; T cells were stained with Rat Anti-Mouse CD4-PE-Cy<sup>TM</sup>7, Rat Anti-Mouse CD8a-FITC and Hamster Anti-Mouse CD183-Brilliant Violet 421 (CXCR3); NKT cells were stained with Rat Anti-Mouse CD3-Alexa Fluor 647 and Mouse Anti-Mouse NK-1.1-FITC. Otherwise, to detect Tregs, spleen and livers were disaggregated and mononuclear cells were obtained as described above. Next, mononuclear cells were treated with the Mouse Foxp3 Buffer Set (BD) following the manufacturer's instructions and stained with Rat anti-Mouse Foxp3-Alexa Fluor 488 (BD) and Rat Anti-Mouse CD4-PE-Cy<sup>TM</sup>7. The samples were evaluated by flow cytometry (FACS Canto II; BD) and the data were analysed using BD FACSDIVA<sup>TM</sup> Software (BD).

### Fluorescent-conjugated antibodies

| Antibody                    | Fluorochrome            | Catalog #  | Brand         |
|-----------------------------|-------------------------|------------|---------------|
| Rat Anti-Mouse CD4          | PE-Cy <sup>TM</sup> 7   | 552775     | BD Bioscience |
| Rat Anti-Mouse CD8a         | FITC                    | 553030     | BD Bioscience |
| Hamster Anti-Mouse<br>CD183 | Brilliant Violet<br>421 | 562937     | BD Bioscience |
| Rat Anti-Mouse CD3          | Alexa Fluor 647         | 557869     | BD Bioscience |
| Mouse Anti-Mouse NK-1.1     | FITC                    | 553164     | BD Bioscience |
| Rat Anti-Mouse F4/80        | PE                      | 12-4801-80 | e-Bioscience  |
| Rat Anti-Mouse CD11b        | Alexa Fluor 647         | 557686     | BD Bioscience |

---

|                      |                 |        |               |
|----------------------|-----------------|--------|---------------|
| Rat anti-Mouse Foxp3 | Alexa Fluor 488 | 560407 | BD Bioscience |
|----------------------|-----------------|--------|---------------|

---

### **Cytokine detection on cell culture supernatant**

Interleukin (IL) IL-2, IL-4, IL-5, IL-10, interferon gamma (IFN $\gamma$ ) and tumour necrosis factor alpha (TNF $\alpha$ ) concentrations were determined in the supernatants of cultured CD4<sup>+</sup> cells using a Milliplex® MAP Mouse Cytokine/Chemokine Detection Panel (a multiple immunoassay based on Luminex Technology) following the manufacturer's instructions (EMD Millipore, Germany).

### **Chimerism analysis**

100  $\mu$ l of peripheral blood was collected from the tail; total blood was stained with anti-CD45.1 and anti-CD45.2 antibodies (BD Bioscience). Next, erythrocytes were lysed with Lysing Buffer following the manufacturer's instructions (BD PharmLyse). Relative percentages of CD45.1<sup>+</sup> cells (of donor origin) with respect to total CD45<sup>+</sup> were calculated by flow cytometry analysis in all the transplanted mice.

### **Determination of caspases activity**

To further elucidate liver damage, we performed an assay to detect Caspase 3 and 7 activity. First, the liver tissue was homogenized in an hypotonic buffer (HEPES 25 mM pH7, 5, MgCl<sub>2</sub>.6H<sub>2</sub>O 5 mM, EGTA 1mM and 1  $\mu$ g/ml of protease inhibitors). Afterwards protein concentrations were determined by colorimetric assay with Bradford (Bio-Rad, CA, US). Next, 100  $\mu$ g/ml of whole liver protein was mixed with Caspase-GLO 3/7 Assay (Promega, WI, USA) following the manufacturer's instructions. After 120 minutes of incubation, luminescence was detected and quantified in a Luminometer (FLUOStar Optima; BMG LabTech, Germany).

### **Immunohistochemistry**

Paraffin-embedded liver sections were stained with CD45 (1:40, BD Pharmigen) or MPO (1:200, Abcam, Cambridge, UK) antibodies overnight at 4°C. Afterwards, the sections were incubated with secondary antibodies (Dako, Glostrup, Denmark) for 30 minutes at room temperature, then stained with 3,3'-diaminobenzidine (DAB, Dako) and counterstained with haematoxylin. The sections were visualized at a magnification of 200 and positive areas were quantified in 15 different fields. The results were expressed as the percentage of positive-stained area.

### **TUNEL Assay**

Paraffin-embedded liver sections were stained with the In Situ Cell Death Detection Kit, TMR red (Sigma-Aldrich) following the manufacturer's instructions. To counterstain the nuclei the Vectashield Antifade Mounting Medium with DAPI (Vector Laboratories) was used. Sections were visualized at a magnification of 40x and apoptotic areas were quantified in 15 different fields. Percentage of stained area was calculated with the image software Image J.

### **Immunoblot and protein analysis**

Protein extracts were electrophoresed and then blotted following standard procedures. The blots were incubated with primary antibodies for cleaved Caspase 3 (Cell Signaling Technology, Barcelona, Spain), phospho-JNK (Cell Signaling Technology), RIPK1 (BD Transduction Laboratories) and RIPK3 (ProSci, CA, US). Anti-rabbit-HRP (Bio-Rad) and anti-mouse-HRP (Bio-Rad) were used as secondary antibodies. GAPDH (Bio-Rad) was used as the loading control.

### **Extraction of RNA, quantification of miRNA and gene expression**

Whole RNA containing mRNA and miRNA was extracted using Trizol following the manufacturer's instructions (Life Technologies, Carlsbad, CA). MiRNA quantification

was performed using the Mir-X miRNA First-Strand Synthesis Kit according to the manufacturer's instructions (Takara Bio Europe/Clontech, Saint-Germain-en-Laye, France). Data were normalized using U6 snoRNA as the endogenous control. The human or mice sequences of miR-155 were obtained from the miRbase database: hsa-miR-155 TTAATGCTAATCGTGATAGGGGT and mmu-miR-155 TTAATGCTAATTGTGATAGGGGT. Custom primers were used (Integrated DNA Technologies, BVBA, Leuven, Belgium). mRNA quantification was accomplished using the Taqman gene expression assay probe and primers. Both miRNA and mRNA levels were measured by real-time quantitative PCR (qPCR) with an ABI 7900 HT cycler (Thermo Fisher, MA, US). Expression values were calculated based on the  $\Delta\Delta C_t$  method and expressed as  $2^{-\Delta\Delta C_t}$ .
